# Supplementary material for: Lucanthone, Autophagy Inhibitor, Enhances the Apoptotic Effects of TRAIL through miR-216a-5p-Mediated DR5 Upregulation and DUB3-Mediated Mcl-1 Downregulation
Source: MDPI journal article supplement (doi:10.3390/ijms23010017), 2021-12-21

Figure 1A

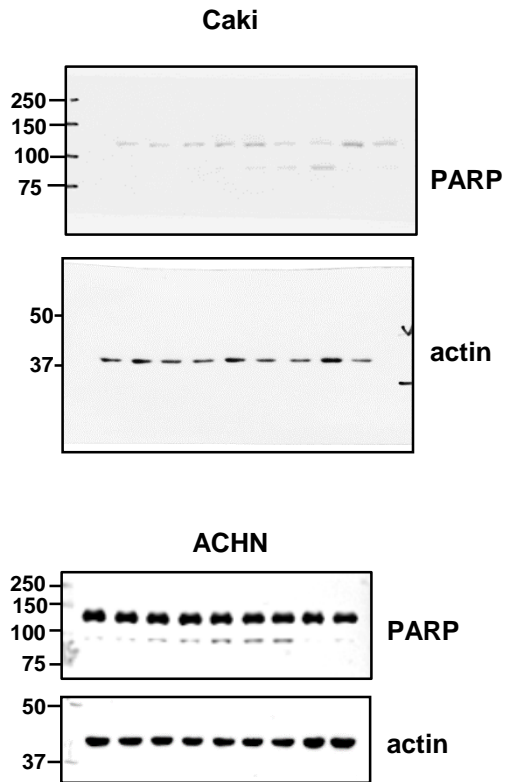

Figure 1E

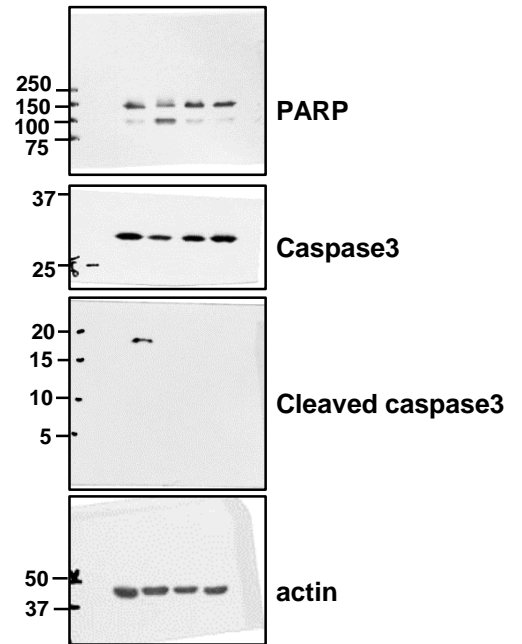

Figure 2A

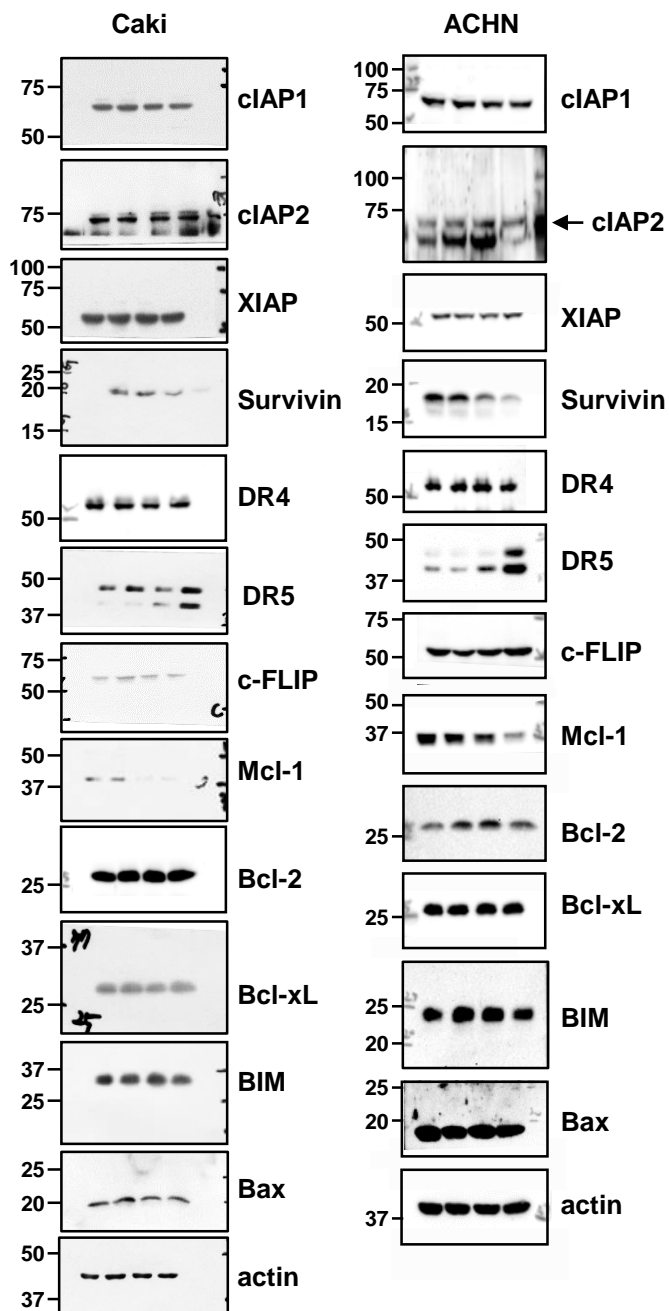

Figure 2B

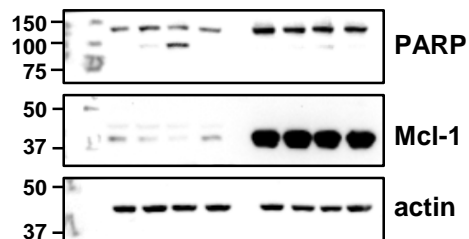

Figure 2C

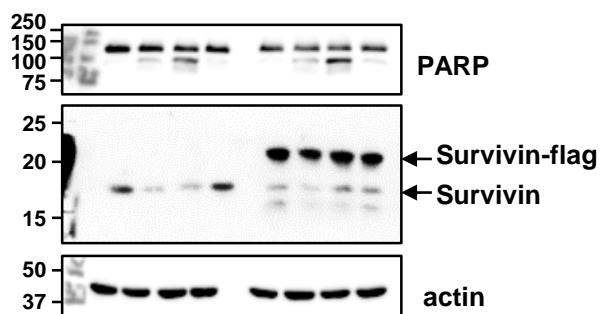

**Figure 3A**

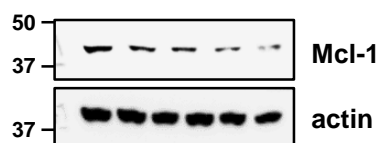

**Figure 3C**

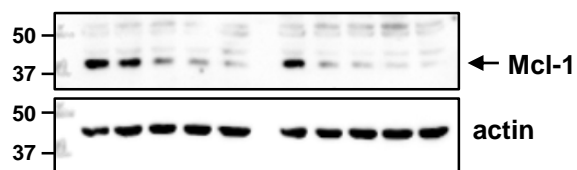

**Figure 3D**

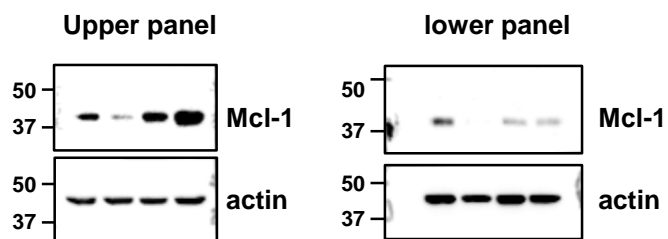

Figure 4A

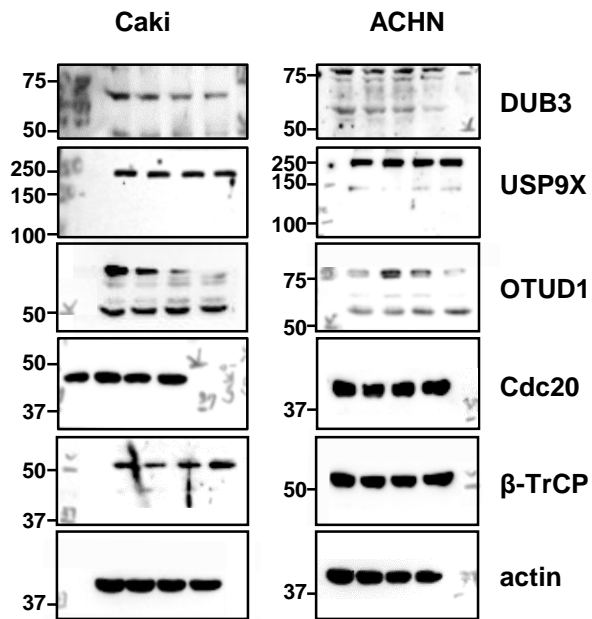

Figure 4B

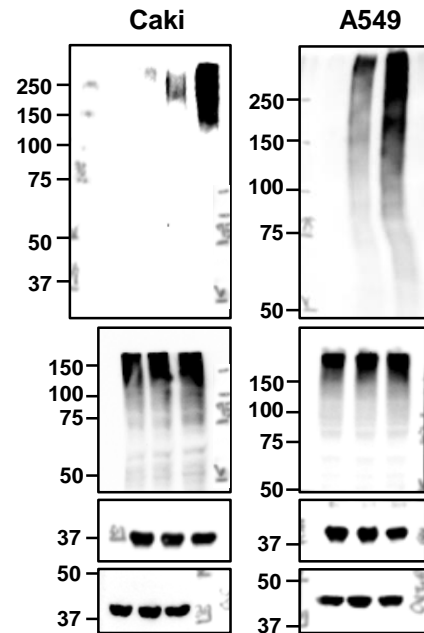

Figure 4C

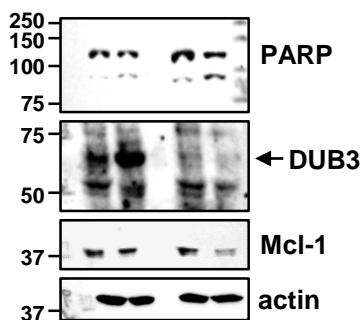

Figure 4D

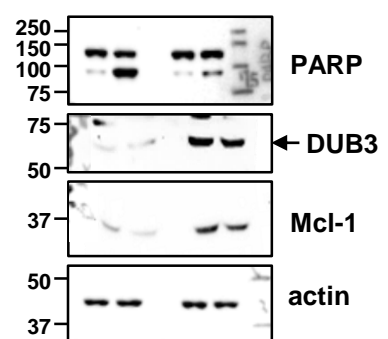

**Figure 5E**

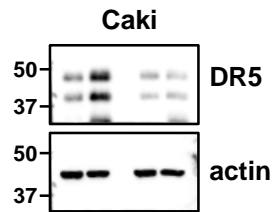

**Figure 5F**

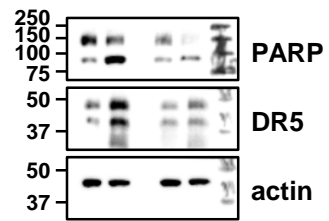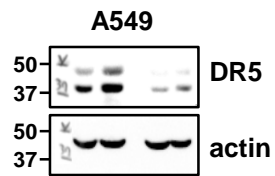

Figure 6A

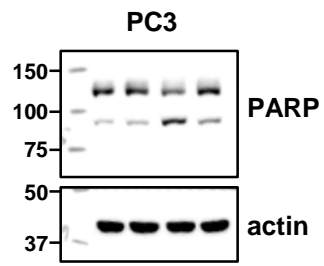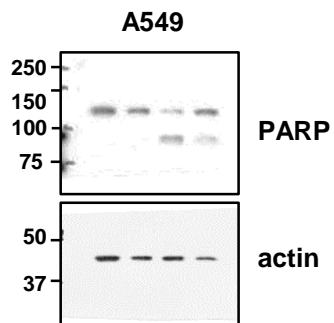

Figure 6B

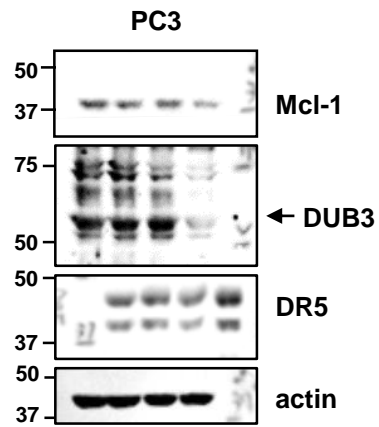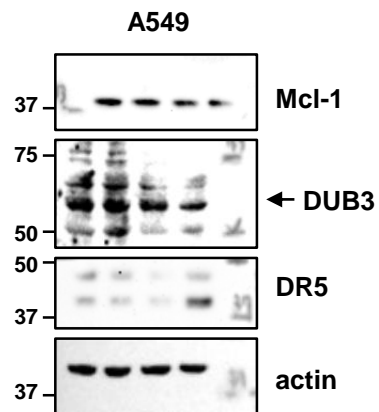

**Figure S2B**

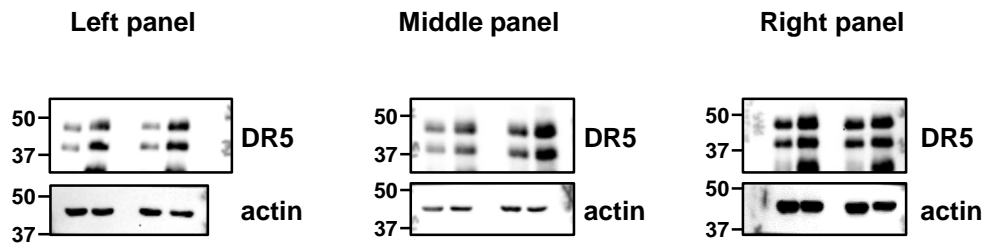

Supplement: s1 [file s1]
