# Supplementary material for: Lucanthone, Autophagy Inhibitor, Enhances the Apoptotic Effects of TRAIL through miR-216a-5p-Mediated DR5 Upregulation and DUB3-Mediated Mcl-1 Downregulation
Source: MDPI journal article supplement (doi:10.3390/ijms23010017), 2021-12-21
Supplement: s1 [file s1]

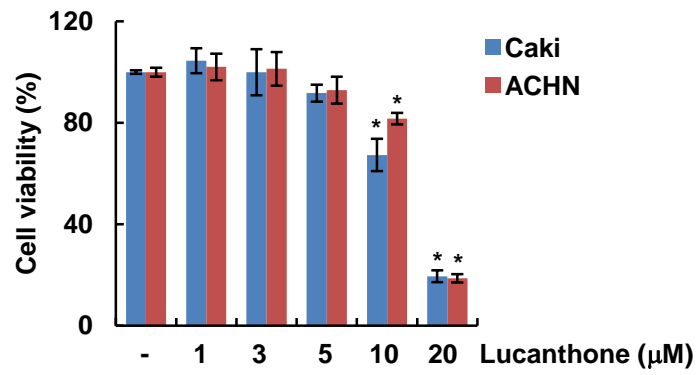

**Figure S1.** Effect of lucanthone on apoptosis in human renal carcinoma cells. Caki and ACHN cells were treated with 1-20  $\mu$ M lucanthone, and measured cell viability using XTT assay.

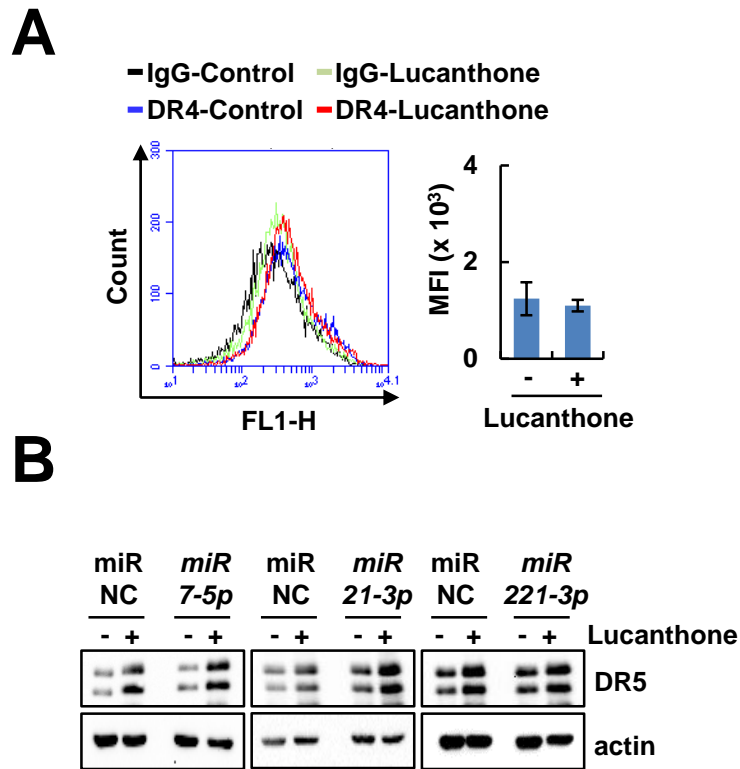

**Figure S2.** Effect of microRNA mimics on lucanthone-mediated DR5 upregulation. **(A)** Caki cells were treated with 5  $\mu$ M lucanthone for 24 h, and analyzed DR4 expression on the cell surface using flow cytometry. **(B)** Caki cells were transfected with various microRNA mimics (miR-negative control (NC), *miR*-7-5p, *miR*-21-3p, or *miR*-221-3p) and then treated with 5  $\mu$ M lucanthone for 24 h. The protein expression was measured by Western blotting. The values in graph **(A)** represent the mean  $\pm$  SD of three independent samples.
